# Supplementary material for: Proton transport in assemblies of silica colloidal spheres
Source: Royal Society of Chemistry journal article supplement (doi:10.1039/b807419d), 2008-01-01
Supplement: b807419d.pdf [file b807419d.pdf]

Supplementary Material (ESI) for Journal of Materials Chemistry  
This journal is © The Royal Society of Chemistry 2008

## Supplementary Information

# Proton Transport in Assemblies of Silica Colloidal Spheres

Joanna J. Smith, Ravikanth Raju Abbaraju, and Ilya Zharov\*

5

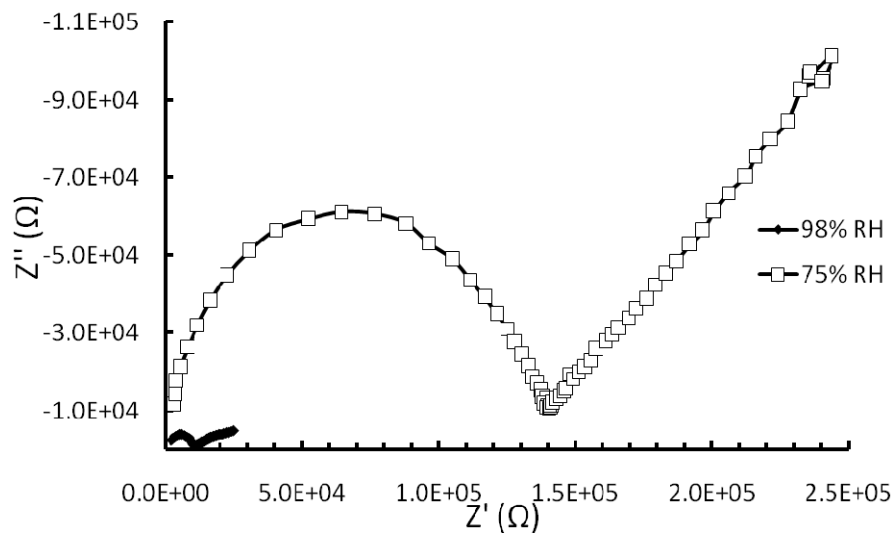

**Figure S1.** Representative Nyquist plots for the silica colloidal material. Shown are the plots for unmodified close-packed assembly at 75 and 98 % R.H.
